# Supplementary material for: Basicity of lactones and cyclic ketones towards I2and ICl. An experimental and theoretical study
Source: Royal Society of Chemistry journal article supplement (doi:10.1039/b305387n), 2003-01-01
Supplement: b305387n.pdf [file b305387n.pdf]

## Supporting Information

**Table S1.** Total energies ( $E_h/a.u.$ ), zero point energies (ZPE/kcal.mol<sup>-1</sup>) and entropy values (S/cal.mol<sup>-1</sup> K<sup>-1</sup>) of ketones and ketones-I<sub>2</sub>/ICl

|                        | $-E_{HF/LANL2DZ^*}$ | $-E_{MP2/LANL2DZ^*}$ | ZPE      | $S_{Tot}$ |
|------------------------|---------------------|----------------------|----------|-----------|
| <b>1</b>               | 190.7564526         | 191.3005             | 0.066055 | 64.00     |
| <b>1-I<sub>2</sub></b> | 213.1000806         | 213.8462389          | 0.067181 | 104.48    |
| <b>1-ICl</b>           | 216.6323065         | 217.4043075          | 0.067883 | 96.62     |
| <b>2</b>               | 229.834567          | 230.5040534          | 0.098055 | 71.91     |
| <b>2-I<sub>2</sub></b> | 252.178822          | 253.0507963          | 0.099240 | 112.34    |
| <b>2-ICl</b>           | 255.7114571         | 256.6092546          | 0.099800 | 103.74    |
| <b>3</b>               | 268.9074538         | 269.7055494          | 0.13076  | 73.78     |
| <b>3-I<sub>2</sub></b> | 291.2521675         | 292.2532378          | 0.131859 | 113.12    |
| <b>3-ICl</b>           | 294.785162          | 295.8120431          | 0.132563 | 105.25    |
| <b>4</b>               | 307.9507943         | 308.8785838          | 0.162577 | 78.17     |
| <b>4-I<sub>2</sub></b> | 330.2954848         | 331.4262955          | 0.163666 | 117.77    |
| <b>4-ICl</b>           | 333.8284309         | 334.984999           | 0.164375 | 110.07    |
| <b>5</b>               | 346.9782902         | 348.0376855          | 0.193676 | 84.49     |
| <b>5-I<sub>2</sub></b> | 369.3230397         | 370.5854891          | 0.194761 | 124.16    |
| <b>5-ICl</b>           | 372.8560365         | 374.1443261          | 0.195483 | 116.37    |

**Table S2.** Total energies ( $E_h/a.u.$ ), zero point energies (ZPE/kcal.mol<sup>-1</sup>) and entropy values (S/cal.mol<sup>-1</sup> K<sup>-1</sup>) of lactones and lactones-I<sub>2</sub>/ICl.

|                                | -E <sub>HF/LANL2DZ*</sub> | -E <sub>MP2/ANL2DZ*</sub> | ZPE      | S <sub>Tot</sub> |
|--------------------------------|---------------------------|---------------------------|----------|------------------|
| <b>6</b>                       | 226.6119261               | 227.2059782               | 0.042328 | 62.48            |
| <b>6-I<sub>2</sub></b> (syn)   | 248.9544869               | 249.7492536               | 0.043334 | 105.33           |
| <b>6-I<sub>2</sub></b> (anti)  | 248.9546139               | 249.7497209               | 0.043384 | 104.67           |
| <b>6-ICl</b> (syn)             | 252.4859158               | 253.3065907               | 0.043989 | 97.26            |
| <b>6-ICl</b> (anti)            | 252.4859849               | 253.3070177               | 0.044043 | 96.85            |
| <b>7</b>                       | 265.6922893               | 266.4076226               | 0.074731 | 67.35            |
| <b>7-I<sub>2</sub></b> (syn)   | 288.0360644               | 288.9523735               | 0.075778 | 108.58           |
| <b>7-I<sub>2</sub></b> (anti)  | 288.0360465               | 288.953065                | 0.075813 | 108.22           |
| <b>7-Icl</b> (syn)             | 291.568414                | 292.510356                | 0.076451 | 100.81           |
| <b>7-Icl</b> (anti)            | 291.5682676               | 292.5110474               | 0.076504 | 100.41           |
| <b>8</b>                       | 304.7606283               | 305.6008739               | 0.106773 | 72.23            |
| <b>8-I<sub>2</sub></b> (syn)   | 327.1055837               | 328.1474841               | 0.107825 | 112.21           |
| <b>8-I<sub>2</sub></b> (anti)  | 327.1052496               | 328.1476512               | 0.107828 | 112.37           |
| <b>8-Icl</b> (syn)             | 330.6387502               | 331.706140                | 0.108514 | 104.59           |
| <b>8-Icl</b> (anti)            | 330.6381163               | 331.7062055               | 0.108532 | 104.45           |
| <b>9</b>                       | 343.7957029               | 344.7647989               | 0.137812 | 77.92            |
| <b>9-I<sub>2</sub></b> (syn)   | 366.1413795               | 367.3126824               | 0.138913 | 117.19           |
| <b>9-I<sub>2</sub></b> (anti)  | 366.1406485               | 367.312166                | 0.138885 | 117.92           |
| <b>9-Icl</b> (syn)             | 369.6750287               | 370.8717261               | 0.139612 | 109.54           |
| <b>9-Icl</b> (anti)            | 369.6737818               | 370.8709739               | 0.139586 | 110.07           |
| <b>10</b>                      | 382.8316872               | 383.9324963               | 0.169084 | 82.23            |
| <b>10-I<sub>2</sub></b> (syn)  | 405.1774421               | 406.4806208               | 0.170179 | 121.38           |
| <b>10-I<sub>2</sub></b> (anti) | 405.176629                | 406.4799551               | 0.170153 | 122.32           |
| <b>10-Icl</b> (syn)            | 408.7111294               | 410.0397204               | 0.170880 | 113.73           |
| <b>10-Icl</b> (anti)           | 408.7097123               | 410.0386612               | 0.170855 | 114.46           |
